# **Title: Social effects of rabies infection in male vampire bats (*Desmodus rotundus*)**

**Elsa M. Cárdenas Canales**<sup>\*1</sup>

**Sebastian Stockmaier**<sup>\*2</sup>

Eleanor Cronin<sup>2</sup>

Tonie Rocke<sup>3</sup>

Jorge E. Osorio<sup>1</sup>

Gerald G. Carter<sup>2,4</sup>

**\*co-first authors**

**Corresponding authors:** EMCC (crdenascanal@wisc.edu), SS

(sebastian.stockmaier24@gmail.com)

## **Affiliations**

1. Department of Pathobiological Sciences, School of Veterinary Medicine, University of Wisconsin-Madison, Madison, WI 53706, USA
2. Department of Evolution, Ecology and Organismal Biology, The Ohio State University, Columbus, OH 43210, USA
3. U.S. Geological Survey, National Wildlife Health Center, Madison, WI 53711, USA
4. Smithsonian Tropical Research Institute, Balboa Ancón, Panama

**Word counts:** Title (11); Abstract (180); Main text + figure/table legends + acknowledgements/funding (2508)

## **Abstract (resumen en español, S1)**

Rabies virus (RABV) transmitted by the common vampire bat (*Desmodus rotundus*) poses a threat to agricultural development and public health throughout the Neotropics. The ecology and evolution of rabies host-pathogen dynamics are influenced by two infection-induced behavioral changes. RABV-infected hosts often exhibit increased aggression which facilitates transmission, and rabies also leads to reduced activity and paralysis prior to death. Although several studies document rabies-induced behavioral changes in rodents and other dead-end hosts, surprisingly few studies have measured these changes in vampire bats, the key natural reservoir throughout Latin America. Here, we take advantage of an experiment designed to test the safety and efficacy of an oral rabies vaccine in captive male vampire bats to quantify for the first time how rabies affects allogrooming and aggressive behaviors in the vampire bat. Compared to non-rabid vampire bats, rabid individuals reduced their allogrooming prior to death, but we did not detect increases in aggression among bats. To put our results in context, we review what is known and what remains unclear about behavioral changes of rabid vampire bats.

## **Introduction**

Rabies virus (RABV) transmitted by the blood-feeding common vampire bat (*Desmodus rotundus*) creates a substantial burden for agricultural development and public health throughout Latin America, with deadly rabies outbreaks occurring in livestock [1–3] and humans [4,5]. RABV is transmitted by direct contact between the virus-laden saliva of the infected bat and the other animal's broken skin, eyes, or mucous membranes. RABV transmission can occur both among vampire bats and when they bite livestock, wildlife, or less frequently, humans, leading to cross-species transmission [2,6]. Recent studies combining mathematical modeling, RABV phylodynamics, and the ecology, demography, and dispersal of vampire bats have

shown great potential to predict and mitigate these pathogen spillover events [6–9].

Surprisingly few studies, however, have directly investigated how RABV infection affects vampire bat behavior. In mustelids [10,11], canines [12,13], rodents [14], and humans [15], RABV can lead to paralysis without obvious increases in aggression before death (“paralytic” rabies), but it can also induce aggression and biting (“furious” rabies) which is likely to increase transmission to other hosts (pathogen manipulation) [16]. Given that aggressive interactions are commonly observed in vampire bats, especially among males [17–19], and that RABV is detectable in the saliva at the end of infection [20,21], increases in aggression in rabid vampire bats should enhance transmission. In a previous study [21], seven confirmed naturally RABV-exposed vampire bats showed no obvious symptoms and survived, while seven others presented two distinct disease outcomes. Three bats showed *furious* rabies presentation with hypersalivation, excess vocalizations, teeth chattering, aggression towards handlers and other bats, and irritability to light and sound. Four bats showed *paralytic* rabies presentation with social isolation, lethargy, and apparent respiratory distress. Although these anecdotal observations demonstrate both presentations are possible, they appear in some studies but not others (Table 1), and the relative probability of paralytic versus furious symptoms in rabid vampire bats remains unclear.

Besides biting, another possible transmission pathway is allogrooming, i.e., the licking and chewing of a conspecific’s fur and skin [22]. Allogrooming takes up about 3-5% of a bat’s active time [23], is sometimes targeted to wounds on the skin, and can reopen minor wounds (GGC, personal observation) creating potential for transfer of saliva. Allogrooming of the face and mouth is sometimes followed by regurgitations of ingested blood (e.g., [24]), which could also lead to RABV transmission [25]. No study has yet quantified changes in allogrooming in rabid bats.

During a study to evaluate a recombinant rabies vaccine candidate for vampire bats, we opportunistically measured rates of aggression and allogrooming in 40 captive male vampire bats that were experimentally infected with RABV. We then compared aggression and allogrooming in non-rabid bats to bats confirmed positive for rabies at death or the end of the study.

## Material and Methods

### *Capture and care*

We collected behavior data from 40 male common vampire bats that were part of a larger sample of bats used to test a viral-vectored recombinant mosaic glycoprotein rabies vaccine candidate. The bats were captured in the State of San Luis Potosí, México, July-Aug 2018, and transported to the U.S. Geological Survey National Wildlife Health Center in Madison, Wisconsin, USA (for details see [21]). Bats were individually marked by combinations of 0-4 bat bands (Porzana Limited, Icklesham, UK) on the right or left forearm.

### *Experimental procedure*

Bats were caged according to three treatments: (1) oral vaccination, (2) topical vaccination, or (3) placebo control. Treated bats remained caged together for ~120 days before being challenged with RABV. One week prior to the challenge, we reassigned the bats into new groups, so individuals that received different treatments would be included in each cage and given time to acclimate (3 cages with 13, 13, and 14 bats each). All bats were challenged with a heterologous RABV variant (of coyote origin) at a dose of  $10^{3.3}$  tissue culture infective dose (TCID<sub>50</sub>/mL), injected intramuscularly into each masseter muscle (50  $\mu$ L on each side) in April 2019 (127 days post-vaccination). We began quantifying behaviors one day after the challenge. To confirm death by rabies, we performed a direct fluorescent antibody test for RABV in brain impression smears of bats following standard procedures [26]. To detect RABV shedding in the

saliva, we collected oral swabs periodically from all individuals, daily if clinical signs were observed, and upon death. Swabs were tested using real-time PCR as described elsewhere [27,28].

### *Behavioral data collection*

After the bats were challenged with RABV, they were recorded using an infrared surveillance system (Amcrest 960 H/+) with a different camera pointed into each cage through a clear acrylic viewing window. In each of the three cages, we sampled behaviors three hours per night (at hours 0100, 0300, and 0500) during the most active period [29]. At every new-minute mark, an observer that was blind to the infection status of the bats stopped the video and recorded the presence or absence of either allogrooming or aggression within a 5-second time window and the identities of the actor and receiver (based on their unique combination of forearm bands). Allogrooming involves licking or chewing another bat's fur or skin and often occurs with two bats allogrooming each other simultaneously (video S1). Aggressive events included biting and fighting (video S2), and a behavior we call "clinging" where a bat bites into another bat's neck and clings onto it for a prolonged time period while the target is actively trying to shake off the aggressor (video S3).

### *Statistical analysis*

For each night we collected 180 presence/absence samples per group except for two nights when 53 samples and 29 samples were missing due to camera outages (resulting in a total of 18,818 behavioral samples). We counted the number of observed allogrooming and aggression events for each bat and divided it by the three sampled hours to estimate behavioral rates per hour. We estimated the 95% confidence intervals (CIs) around the mean rate for each of the two treatment groups, rabid and non-rabid, using bootstrapping (percentile method, 5,000 iterations, boot R package, [30]).

Because the exact timeline of infection was unclear, we plotted for every rabid bat an effect size (standardized mean difference between observed and expected) during increasingly large (nested) time periods, from 1 day to 15 days before death (excluding one bat that survived until the end of the experiment 50 days after the challenge). To do this, we calculated the mean behavior count for each focal rabid bat for a given period prior to death (e.g., 4 days = days 1-4 prior to death), then compared that observed mean to the expected mean (i.e., the mean count of all non-rabid bats within the same group and time period). To get an effect size for each time period, we standardized this mean difference:

$$\text{standardized mean difference} = \frac{\text{mean count of rabid bat} - \text{mean count of non-rabid bats}}{\text{pooled standard deviation}}$$

## **Results**

Fourteen bats died after the experimental RABV challenge; all were confirmed RABV positive, and deaths occurred in all three cages and in all three treatment groups (5 controls, 4 oral vaccinates, and 5 topically vaccinated). We detected no difference between the vaccination treatments on behavioral rates in rabid bats (Fig. S5, Table S6). The time of death ranged from 9-29 days post-challenge. One other RABV-challenged bat that had been topically vaccinated was alive by the end of the experiment (after 50 days) but confirmed rabid after it was euthanized. None of the 10 vaccinated bats that became rabid were shedding virus. In the unvaccinated rabid bats, we detected RABV shedding in the saliva of 3 bats on the day of death, and one of these was also shedding RABV the day prior to death.

In rabid bats, we did not detect a clear increase in aggression given (Fig. 1) or received

(Fig. S2). Rabid vampire bats both gave and received less allogrooming than their healthy cagemates. This difference occurred on average about 12 days after inoculation and increased as we considered time periods closer to their death (Fig. 2, S3). The decrease in allogrooming and low levels of aggression are consistent with paralytic rather than furious rabies.

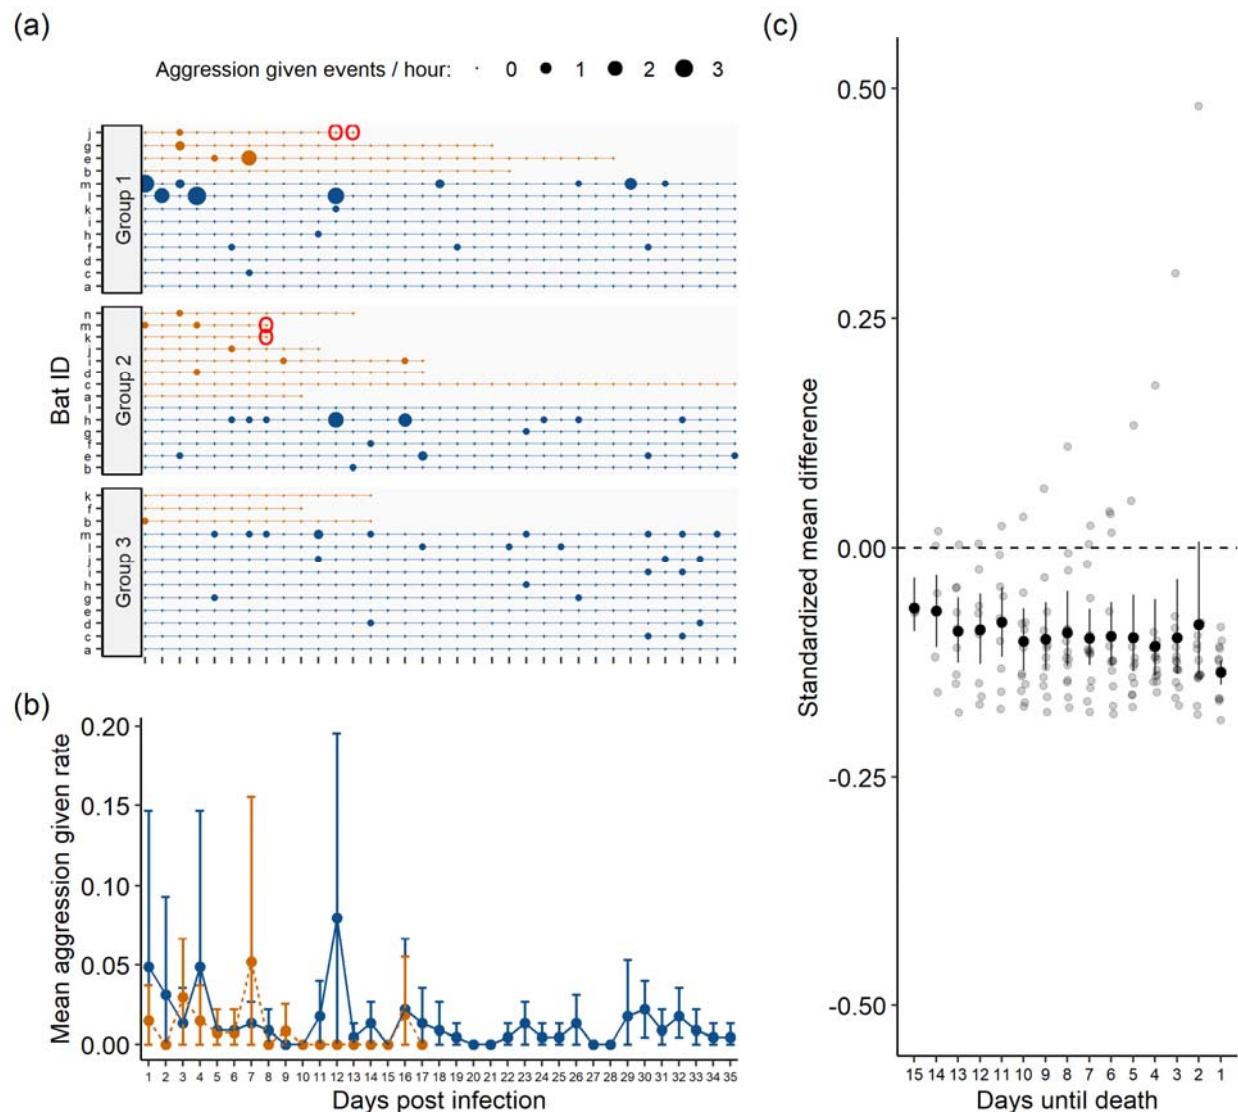

**Figure 1: No evidence of increased aggression in rabid male vampire bats prior to death.** Panel (a) shows timeline of aggression event counts for each rabid (orange points) and non-rabid (blue point) vampire bat across three groups. Point size reflects the rate of observed events per hour. Red circles show RABV positive saliva sample. Panel (b) shows mean rate of aggression events per hour with 95% CIs for rabid and non-rabid bats starting one day after inoculation with RABV. Panel (c) shows the standardized mean difference with 95% CIs between rabid bats and healthy cagemates during shrinking time intervals before death. Outliers in panel c are caused by one rabid bat (group 2-i) that showed aggression 16 days post-challenge (2 days prior to death). See Table S4 for CIs.

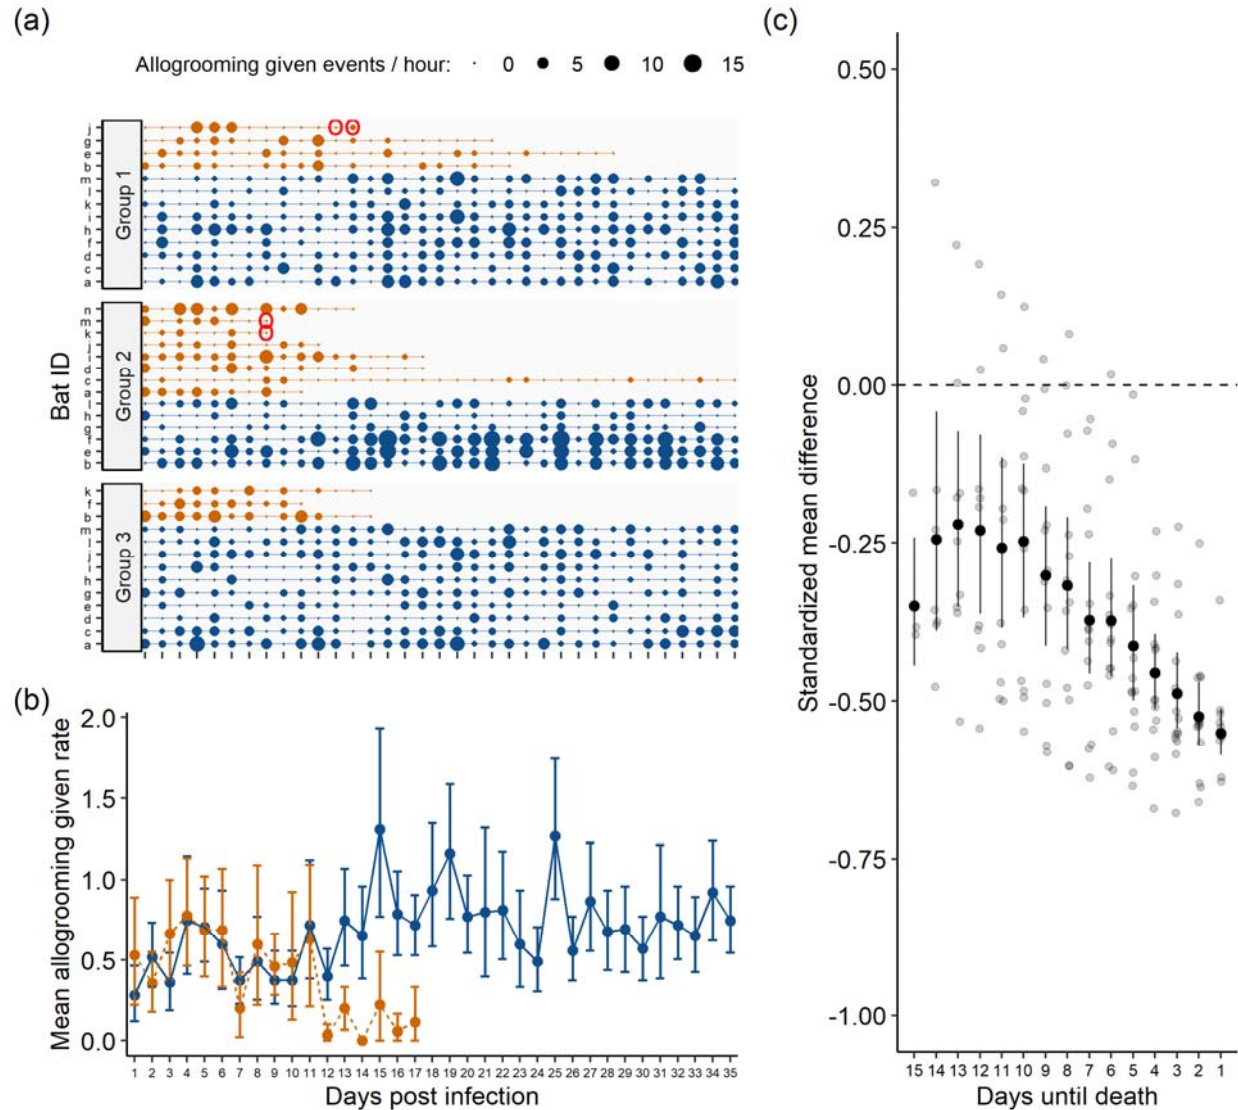

**Figure 2: Reduced allogrooming prior to death in rabid male vampire bats.** Panel (a) shows timeline of allogrooming events counts for each rabid (orange points) and non-rabid (blue point) vampire bat across three groups. Point size reflects the rate of observed events per hour. Red circles show RABV positive saliva sample. Panel (b) shows mean rate of allogrooming events per hour with 95% CIs for rabid and non-rabid bats starting one day after inoculation with RABV. Panel (c) shows the standardized mean difference with 95% CIs between rabid bats and healthy cagemates during shrinking time intervals before death. See Table S4 for CIs.

**Table 1:** Studies anecdotally describing rabies-induced changes in social behavior of vampire bats after injection or natural exposure.

| <i>Reference</i> | <i>Result</i>                                                        | <i>Method</i>         | <i>Type of virus used</i>                                                                                                                   | <i>Comments</i>                                                                                                                                                                                                                     |
|------------------|----------------------------------------------------------------------|-----------------------|---------------------------------------------------------------------------------------------------------------------------------------------|-------------------------------------------------------------------------------------------------------------------------------------------------------------------------------------------------------------------------------------|
| Present study    | No increase in aggressive behavior observed, reduced social grooming | Behavioral sampling   | Coyote variant                                                                                                                              | 40 male vampire bats. Some previously vaccinated. 15 bats rabies confirmed.                                                                                                                                                         |
| [25]             | No aggression, grooming unobserved                                   | Anecdotal observation | T-9/95 vampire bat field isolate from before 2001 (no detailed information). Study published in 2009. Isolate location unknown.             | 10 vampire bats (7 males, 3 females). 4 bats confirmed positive. Signs of paralytic rabies in all 4.                                                                                                                                |
| [31]             | No aggression, grooming unobserved                                   | Anecdotal observation | CASS-88 vampire bat origin, isolated from infected cow brain in 1988. Study published in 1998.                                              | 24 vampire bats (no information on sex). Some bats previously vaccinated with oral vaccine. 16 confirmed positive. Signs of paralytic rabies in 10/16. Others showed no obvious clinical signs.                                     |
| [20]             | No aggression, grooming unobserved                                   | Anecdotal observation | CASS-88 vampire bat origin, isolated from infected cow brain in 1988. Study published in 2005.                                              | 14 bats (6 males, 8 females). 11 died. Paralysis of wings and hind-legs prior to death in 3/11. Others showed depression, hypoactivity and anorexia.                                                                                |
| [32]             | No aggression, grooming unobserved                                   | Anecdotal observation | CASS-88 vampire bat origin, isolated from infected cow brain in 1988. Study published in 2002.                                              | Test of rabies vaccine. 9/10 control bats (vaccinated with saline) died of rabies (no information on sex). Altered reflexes, tremor, and paralysis were observed 72–24 hours before death in rabid bats.                            |
| [33]             | No aggression, grooming unobserved                                   | Anecdotal observation | Brldr2918 vampire bat field isolate from 1997. Study published in 2005. Study bat location and location of virus isolate are <100 km apart. | 10 bats died of RABV (no detailed information on sex/deaths). 8 showed signs of paralytic rabies, 2 showed no clinical signs                                                                                                        |
| [34]             | No aggression, grooming unobserved                                   | Anecdotal observation | Brldr2918 vampire bat field isolate from 1997. Study published in 2008. No information on bat capture location                              | 10 bats died of RABV (no detailed information on sex/deaths) some were previously vaccinated (orally, fur-transmissible). All showed signs of paralytic rabies.                                                                     |
| [21]             | Aggression, grooming unobserved                                      | Anecdotal observation | Natural exposure                                                                                                                            | Total of 14 confirmed rabid male bats. 7 showed no clinical signs, 3 the furious form and 4 the paralytic form.                                                                                                                     |
| [35]             | Potential aggression, grooming unobserved                            | Anecdotal observation | Natural exposure                                                                                                                            | Introduction of wild bats to an existing captive colony (no information on sex). After 2 months, fighting started. Several bats from original colony were mutilated and tested for rabies. Suggested aggression of introduced bats. |
| [36]             | Aggression, grooming unobserved                                      | Anecdotal observation | Natural exposure                                                                                                                            | Aggression observed in naturally infected rabid bats. 14 of 24 bats observed showed clinical signs including hyperexcitability, aggressiveness, and paralysis before death.                                                         |

# Discussion

Rabid male vampire bats reduced their allogrooming, and probably as a consequence, also received less allogrooming. This change could be due to either rabies-induced paralysis or generalized sickness behaviors, such as lethargy, causing passive self-isolation [37–40]. All bats showed low rates of aggression, and we saw no clear increase in aggression in the rabid bats, regardless of vaccine treatment group.

Several other studies did not observe heightened aggression in rabid vampire bats (Table 1). One possible reason for this lack of observations is reduced selection on RABV to increase aggression in vampire bats because they are highly social, frequently aggressive, and bite other hosts [41]. Another possibility is that distinct RABV strains differ in pathogenicity and clinical forms of the disease (e.g., presence of aggression) across species [42–45]. Studies describing natural infections often report some aggression, but experimental RABV challenges that failed to find evidence of aggression used viral strains that were not currently circulating or, as in our case, used a strain derived from a different species (Table 1). It would be interesting to determine if infection with endemic vampire bat RABV strains may induce a higher proportion of furious versus paralytic disease in vampire bats.

Similar to field observations [17,36], some rabid bats in our study may have received increased aggression prior to death (see Fig. S2, e.g., bat group 1-j, 2-i, 2-d, 3-b). Acute infections can have a social cost, such as increased antagonism by conspecifics [46], and it would be interesting to examine evidence for avoidance of or aggression towards rabid individuals more closely in this and other species [40].

Times until death in rabid vampire bats varied from 9 to 29 days, but one of the 15 rabid males remained alive until the end of the experiment, 50 days after infection. The bat was previously vaccinated, but its neurologic function declined over the final weeks, losing coordination and mobility. We did not detect RABV in its saliva. The causes of this prolonged survival remain unclear.

In the late stage of infection, RABV spreads to the salivary glands and is excreted in saliva [42]. Evidence of RABV shedding in vampire bats prior to or at the time of death has been demonstrated before [20,33,47]. Here, we detected RABV shedding in saliva of 3 of 15 rabid bats (all 3 unvaccinated), which allowed us to overlay behavioral measures with pathogen shedding (Fig. 1, 2, S2, S3). These 3 vampire bats were not grooming others much when the virus was detectable in their saliva. Similarly, we did not observe heightened social aggression in these periods before death. Future work to quantify the relationship more closely between rabies shedding and behavioral changes would help distinguish this interaction.

Some caveats to the interpretations of our experimental results and those of others (Table 1) should be considered. First, given that social aggression can be rare and brief, absence of evidence of social aggression is not evidence of absence. We observed anecdotal evidence of aggression by some rabid bats towards handlers and other bats when the bats were disturbed. Second, the administered RABV challenge dose, route, and site of inoculation are not standardized across experiments and often differ (Table 1). As in our study, the RABV challenge strains used by researchers do not typically represent currently endemic viruses, are derived from different species, or are adapted to other species before their use in experimental infections. More standardized experimental infections are needed to disentangle the role of administered dose and temporal overlap of circulating strains on rabies-induced behavioral changes in natural reservoirs such as vampire bats.

In conclusion, we observed reductions in allogrooming and low levels of aggression that indicated paralytic but not furious rabies presentation in 15 rabid male vampire bats relative to 25 non-rabid male bats. Alongside other previous reports involving natural rabies exposures that report elevated aggression (Table 1), our results are consistent with the hypothesis that behavioral effects of RABV may vary by strain.

**Ethics:** Field work was carried out under permit SGPA/DGVS/003242/18 from the Mexican Secretariat of Environment and Natural Resources. All animal husbandry practices and experiments were approved by the USGS-National Wildlife Health Center Institutional Animal Care and Use Committee (*Protocol EP180418*). Any use of trade, firm, or product names is for descriptive purposes only and does not imply endorsement by the U.S. Government.

**Data Availability:** All data and R code to repeat the analysis is publicly available on Figshare: <https://doi.org/10.6084/m9.figshare.19991204.v3>

**Competing interests:** We have no competing interests.

**Acknowledgements:** We thank Osric Wong, Natalie Sebulnia, Jaelynn Butler, Michael Shechtman, Olivia Kalczynski, and Raven Hartman for video scoring. Daniel Streicker, Horacio Delpietro, Alvaro Aguilar-Setién, Charles Rupprecht provided literature. We thank Elizabeth Falendysz and Erik Hofmeister for manuscript review.

**Funding:** SS and GGC are supported by the National Science Foundation (grant IOS-2015928). Research was funded by the U.S. Geological Survey, American Association of Zoo Veterinarians (award MSN209345), and a GSR Award (to EMCC) from the UW-Madison Global Health Institute, and International Division IRIS Incubator Grant.

**Authors contributions:** EMCC, SS, and GGC designed the study. EMCC carried out experiments. SS and EC analyzed the data. TR and JEO coordinated the study and provided resources and lab space. GGC conceived of the idea and supervised the data analysis and writing. All authors contributed to draft of manuscript and gave final approval for publication.

## References

1. Benavides JA, Rojas Paniagua E, Hampson K, Valderrama W, Streicker DG. 2017 Quantifying the burden of vampire bat rabies in Peruvian livestock. *PLOS Negl Trop Dis* **11**, e0006105. (doi:10.1371/journal.pntd.0006105)
2. Johnson N, Arechiga-Ceballos N, Aguilar-Setien A. 2014 Vampire bat rabies: ecology, epidemiology and control. *Viruses* **6**, 1911–28. (doi:10.3390/v6051911)
3. Martínez-Burnes J, López A, Medellín J, Haines D, Loza E, Martínez M. 1997 An outbreak of vampire bat-transmitted rabies in cattle in northeastern Mexico. *Can Vet J* **38**, 175–177.
4. Lopez A, Miranda P, Tejada E, Fishbein DB. 1992 Outbreak of human rabies in the Peruvian jungle. *Lancet* **339**, 408–411. (doi:10.1016/0140-6736(92)90088-k)
5. Schneider MC, Romijn PC, Uieda W, Tamayo H, da Silva DF, Belotto A, da Silva JB, Leanes LF. 2009 Rabies transmitted by vampire bats to humans: an emerging zoonotic disease in Latin America? *Rev Panam Salud Publica* **25**, 260–269. (doi:10.1590/s1020-49892009000300010)
6. Streicker DG *et al.* 2012 Ecological and anthropogenic drivers of rabies exposure in vampire bats: implications for transmission and control. *Proc Biol Sci* **279**, 3384–92. (doi:10.1098/rspb.2012.0538)

- 283 7. Blackwood JC, Streicker DG, Altizer S, Rohani P. 2013 Resolving the roles of immunity,  
284 pathogenesis, and immigration for rabies persistence in vampire bats. *Proc Natl Acad Sci*  
285 *USA* **110**, 20837–20842. (doi:10.1073/pnas.1308817110)
- 286 8. Streicker DG *et al.* 2016 Host–pathogen evolutionary signatures reveal dynamics and future  
287 invasions of vampire bat rabies. *Proc Natl Acad Sci USA* **113**, 10926–10931.  
288 (doi:10.1073/pnas.1606587113)
- 289 9. Streicker DG, Allgeier JE. 2016 Foraging choices of vampire bats in diverse landscapes:  
290 potential implications for land-use change and disease transmission. *J Appl Ecol* **53**, 1280–  
291 1288. (doi:10.1111/1365-2664.12690)
- 292 10. Moegle H, Knorpp F. 1978 Zur Epidemiologie der Wildtiertollwut: 2. Mitteilung:  
293 Beobachtungen über den Dachs 1. *Zentralblatt für Veterinärmedizin Reihe B* **25**, 406–415.
- 294 11. Smith GC. 2002 The role of the badger (*Meles meles*) in rabies epizootiology and the  
295 implications for Great Britain. *Mammal Rev* **32**, 12–25. (doi:10.1046/j.1365-  
296 2907.2002.00094.x)
- 297 12. George, J.P., George, J., Blancou, J., Aubert, M.F.A., Description clinique de la rage du  
298 renard. Étude expérimentale (1980) *Rev Méd Vét*, **131**, pp. 153-160.
- 299 13. Shuangshoti S, Thorner PS, Teerapakpinyo C, Thepa N, Phukpattaranont P, Intarut N,  
300 Lumlertdacha B, Tepsumethanon V, Hemachudha T. 2016 Intracellular spread of rabies  
301 virus is reduced in the paralytic form of canine rabies compared to the furious form. *PLOS*  
302 *Negl Trop Dis* **10**, e0004748. (doi:10.1371/journal.pntd.0004748)
- 303 14. Winkler WG, Schneider NJ, Jennings WL. 1972 Experimental rabies infection in wild  
304 rodents. *J Wildl Dis* **8**, 99–103. (doi:10.7589/0090-3558-8.1.99)
- 305 15. Hemachudha T, Wacharapluesadee S, Mitrabhakdi E, Wilde H, Morimoto K, Lewis RA.  
306 2005 Pathophysiology of human paralytic rabies. *J Neurovirol* **11**, 93–100.  
307 (doi:10.1080/13550280590900409)
- 308 16. Klein SL. 2003 Parasite manipulation of the proximate mechanisms that mediate social  
309 behavior in vertebrates. *Physiol Behav* **79**, 441–449. (doi:10.1016/S0031-9384(03)00163-X)
- 310 17. Delpietro HA, Russo RG, Carter GG, Lord RD, Delpietro GL. 2017 Reproductive  
311 seasonality, sex ratio and philopatry in Argentina's common vampire bats. *R Soc Open Sci*  
312 **4**, 160959. (doi:10.1098/rsos.160959)
- 313 18. Wilkinson GS. 1985 The social organization of the common vampire bat. I. Pattern and  
314 cause of association. *Behav Ecol Sociobiol* **17**, 111–121.
- 315 19. Wilkinson GS. 1985 The social organization of the common vampire bat: II. Mating system,  
316 genetic structure, and relatedness. *Behav Ecol Sociobiol* **17**, 123–134.
- 317 20. Aguilar-Setien A, Loza-Rubio E, Salas-Rojas M, Brisseau N, Cliquet F, Pastoret PP, Rojas-  
318 Dotor S, Tesoro E, Kretschmer R. 2005 Salivary excretion of rabies virus by healthy vampire  
319 bats. *Epidemiol Infect* **133**, 517–522. (doi:10.1017/s0950268805003705)

21. Cárdenas-Canales EM *et al.* 2020 Clinical presentation and serologic response during a rabies epizootic in captive common vampire bats (*Desmodus rotundus*). *Trop Med Infect Dis* **5**. (doi:10.3390/tropicalmed5010034)
22. Wilkinson GS. 1986 Social grooming in the common vampire bat, *Desmodus rotundus*. *Anim Behav* **34**, 1880–1889. (doi:10.1016/S0003-3472(86)80274-3)
23. Carter G, Leffer L. 2015 Social grooming in bats: are vampire bats exceptional? *PLoS One* **10**, e0138430. (doi:10.1371/journal.pone.0138430)
24. Carter GG, Wilkinson GS. 2015 Social benefits of non-kin food sharing by female vampire bats. *Proc Biol Sci* **282**. (doi:10.1098/rspb.2015.2524)
25. Agronegócios P, Aparecida MC, Souza M, Nassar C, Cortez A, Sakai T, Itou T, Sequetin EM, José L. 2009 Experimental infection of vampire bats *Desmodus rotundus* (E. Geoffroy) maintained in captivity by feeding defibrinated blood added with rabies virus. *Braz J Vet Res Anim Sci* **46**, 92–100.
26. Rupprecht CE, Fooks AR, Abela-Ridder B. 2018 *Laboratory techniques in rabies*. World Health Organization. Geneva, 5th Edition, Volume 1; Link: <https://apps.who.int/iris/bitstream/handle/10665/310836/9789241515153-eng.pdf>
27. Gigante CM *et al.* 2018 Multi-site evaluation of the LN34 pan-lyssavirus real-time RT-PCR assay for post-mortem rabies diagnostics. *PLoS One* **13**, e0197074. (doi:10.1371/journal.pone.0197074)
28. Wadhwa A *et al.* 2017 A Pan-Lyssavirus Taqman real-time RT-PCR assay for the detection of highly variable rabies virus and other lyssaviruses. *PLoS Negl Trop Dis* **11**, e0005258. (doi:10.1371/journal.pntd.0005258)
29. Ripperger SP, Carter GG. 2021 Social foraging in vampire bats is predicted by long-term cooperative relationships. *PLOS Biol* **19**, e3001366. (doi:10.1371/journal.pbio.3001366)
30. Canty A, Ripley B. 2017 boot: Bootstrap R (S-Plus) functions. *R package version 1*, 3–20.
31. Sétien AA, Brochier B, Tordo N, De Paz O, Desmettre P, Péharpré D, Pastoret P-P. 1998 Experimental rabies infection and oral vaccination in vampire bats (*Desmodus rotundus*). *Vaccine* **16**, 1122–1126. (doi:10.1016/S0264-410X(98)80108-4)
32. Aguilar-Setién A, Leon YC, Tesoro EC, Kretschmer R, Brochier B, Pastoret P-P. 2002 Vaccination of vampire bats using recombinant vaccinia-rabies virus. *J Wildl Dis* **38**, 539–544. (doi:10.7589/0090-3558-38.3.539)
33. Almeida MF, Martorelli LFA, Aires CC, Sallum PC, Durigon EL, Massad E. 2005 Experimental rabies infection in haematophagous bats *Desmodus rotundus*. *Epidemiol Infect* **133**, 523–527. (doi:10.1017/s0950268804003656)
34. Almeida MF, Martorelli LFA, Aires CC, Barros RF, Massad E. 2008 Vaccinating the vampire bat *Desmodus rotundus* against rabies. *Virus Res* **137**, 275–277. (doi:10.1016/j.virusres.2008.07.024)

35. Horst R, Langworthy M. 1972 Rabies in a colony of vampire bats. *J Mammal* **53**, 903–905.
36. Delpietro HA, de Díaz AMO, Larghi OP. 1985 Comportamiento en cautividad de vampiros rabiosos infectados naturalmente. *Veterinaria Argentina* **2**, 748–756.
37. Ripperger SP, Stockmaier S, Carter GG. 2020 Tracking sickness effects on social encounters via continuous proximity sensing in wild vampire bats. *Behav Ecol* **31**, 1296–1302. (doi:10.1093/beheco/araa111)
38. Stockmaier S, Bolnick DI, Page RA, Carter GG. 2020 Sickness effects on social interactions depend on the type of behaviour and relationship. *J Anim Ecol* **89**, 1387–1394. (doi:10.1111/1365-2656.13193)
39. Stockmaier S, Bolnick DI, Page RA, Carter GG. 2018 An immune challenge reduces social grooming in vampire bats. *Anim Behav* **140**, 141–149. (doi:10.1016/j.anbehav.2018.04.021)
40. Stockmaier S, Stroeymeyt N, Shattuck EC, Hawley DM, Ancel Meyers L, Bolnick DI. 2021 Infectious diseases and social distancing in nature. *Science* **371**, eabc8881. (doi:10.1126/science.abc8881)
41. Hart BL. 1990 Behavioral adaptations to pathogens and parasites: five strategies. *Neurosci Biobehav Rev* **14**, 273–294. (doi:10.1016/S0149-7634(05)80038-7)
42. Banyard AC, Davis A, Gilbert AT, Markotter W. Bat rabies. In: Fooks AR, Jackson AC (editors). *Rabies—Scientific Basis of the Disease and its Management*. Elsevier Academic Press, Cambridge, Massachusetts. 2020. pp. 231–276. (doi:10.1016/C2018-0-04330-3)
43. Davis AD, Gordy PA, Bowen RA. 2013 Unique characteristics of bat rabies viruses in big brown bats (*Eptesicus fuscus*). *Arch Virol* **158**, 809–820. (doi:10.1007/s00705-012-1551-0)
44. Obregón-Morales C, Aguilar-Setién Á, Martínez LP, Galvez-Romero G, Martínez-Martínez FO, Aréchiga-Ceballos N. 2017 Experimental infection of *Artibeus intermedius* with a vampire bat rabies virus. *Comp Immunol Microbiol Infect Dis* **52**, 43–47. (doi:10.1016/j.cimid.2017.05.008)
45. Morimoto K, Hooper DC, Carbaugh H, Fu ZF, Koprowski H, Dietzschold B. 1998 Rabies virus quasispecies: implications for pathogenesis. *Proc Natl Acad Sci USA* **95**, 3152–3156. (doi:10.1073/pnas.95.6.3152)
46. McFarland R, Henzi SP, Barrett L, Bonnell T, Fuller A, Young C, Hetem RS. 2021 Fevers and the social costs of acute infection in wild vervet monkeys. *Proc Natl Acad Sci USA* **118**. (doi:10.1073/pnas.2107881118)
47. Moreno JA, Baer GM. 1980 Experimental rabies in the vampire bat. *Am J Trop Med Hyg* **29**, 254–259. (doi:10.4269/ajtmh.1980.29.254)
